# Supplementary material
Source: publisher site journal article supplement (https://www.dovepress.com/get_supplementary_file.php?f=302088.docx)
Supplement: Supplementary file 1 [file get_supplementary_file.php]

**Supplementary Materials**

**
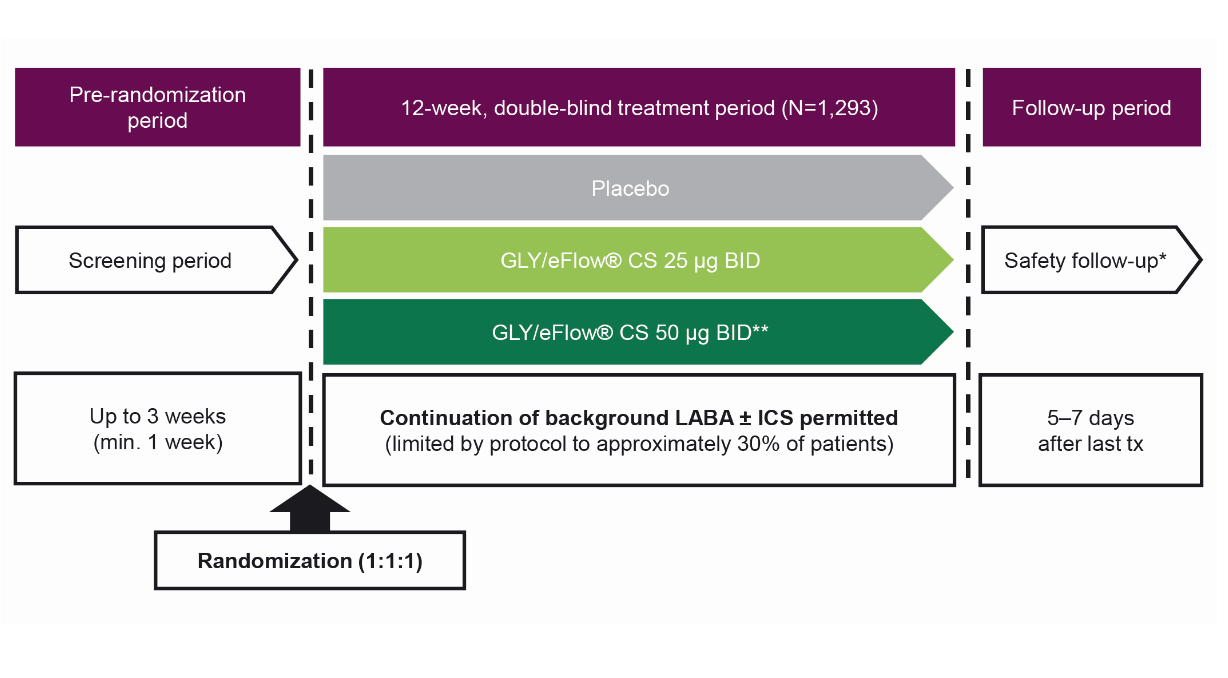
**

**Figure S1.** GOLDEN 3 and 4 study designs: 12-week, randomized, double-blind, placebo-controlled, parallel-group, multicenter studies. Data from Kerwin et al.1

*SAEs were monitored for 30 days after the last dose of study treatment. **Data for the GLY 50 μg BID treatment arm are not presented in this *post hoc* analysis in order to focus on the FDA-approved and clinically relevant GLY 25 μg dose. The data from the 50 μg BID dose was used for identifying the overall prevalence of comorbidities in the study population, but analysis of outcomes was performed using the placebo and GLY 25 μg BID arms.

Abbreviations:BID, twice daily; CS, closed system; GLY, nebulized glycopyrrolate; ICS, inhaled corticosteroids; LABA, long-acting β2-agonist; min, minimum; SAE, serious adverse event; tx, treatment.

**
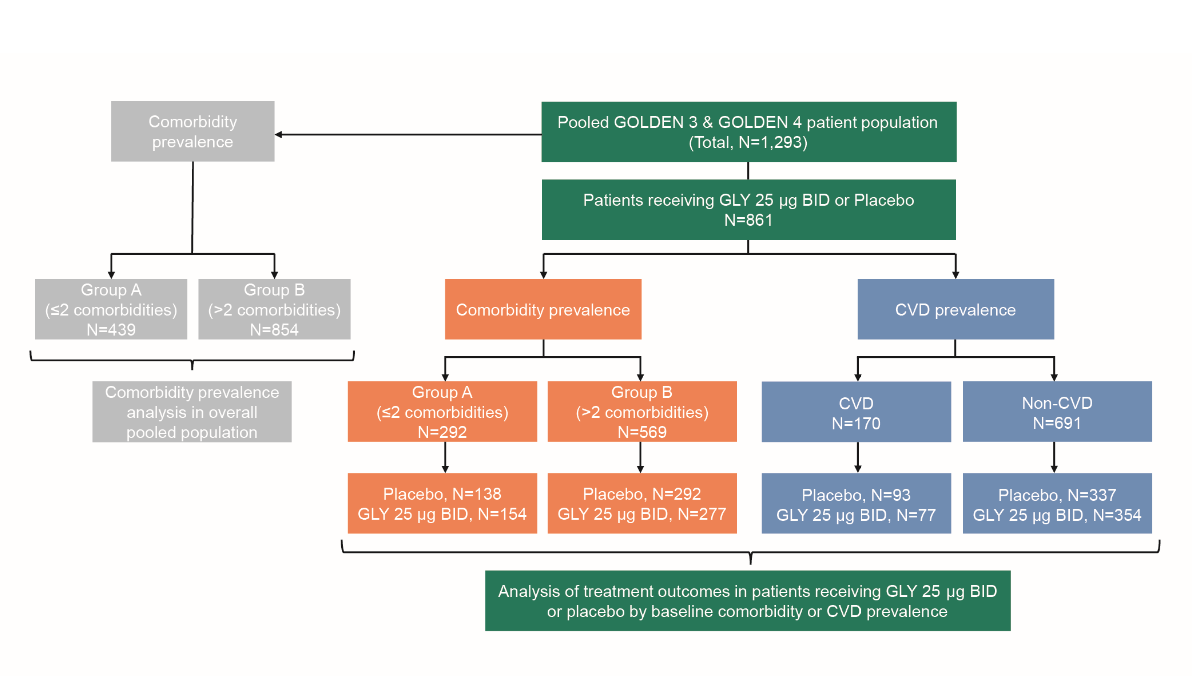
**

**Figure S2.** Patient distribution by comorbidity prevalence for overall analysis and outcomes analysis, as well as distribution by CVD status.

Abbreviations:BID, twice daily; CVD, cardiovascular disease; GLY, nebulized glycopyrrolate

| **Table S1.** Classification of comorbidities identified via patient self-reporting or medical records, by preferred terms. | |
| --- | --- |
| **Comorbidity** | **Preferred term** |
| CHD | “coronary artery disease” or “angina pectoris” or " myocardial infarction” or “acute coronary syndrome” or (“coronary artery bypass” from “surgical and medical procedures”) or (coronary angioplasty from “surgical and medical procedures”) |
| Diabetes | “Type 2 diabetes mellitus” or “diabetes mellitus” |
| CHF | Cardiac failure congestive |
| Hypertension | Hypertension |
| High cholesterol | “Blood cholesterol increased” or “hypercholesterolaemia” or “hyperlipidaemia” or “dyslipidaemia” |
| GERD | Gastrooesophageal reflux disease |
| PVD | Peripheral vascular disorder |
| Obesity | BMI ≥30 kg/m2 |
| Osteoarthritis | Osteoarthritis |
| Osteoporosis | Osteoporosis |
| Depressiona | Depression |
| Anxietya | “Anxiety” or “anxiety disorder” |
| Insomnia | “Middle insomnia” or “insomnia” |
| Sleep Apnea | Sleep apnoea syndrome |
| aSelf-reported medical history for anxiety and depression. For other comorbidities, medical records were used when available.  *Abbreviations:* BMI, body mass index; CHD, coronary heart disease; CHF, congestive heart failure; GERD, gastroesophageal reflux disease; PVD, peripheral vascular disease. | |

| **Table S2.** Prevalence of comorbidities in participants with COPD in COPDGene®, SPIROMICS and GOLDEN 3 and 4 cohorts. COPDGene® and SPIROMICS data were obtained with permission from Putcha N et al., 2014.2 | | | |
| --- | --- | --- | --- |
| **Comorbidity, n (%)** | **COPDGene® N=3,690** | **SPIROMICS N=853** | **GOLDEN 3 and 4 (N=1,293)a** |
| Anxiety | N/A | N/A | 342 (26) |
| Depression | N/A | N/A | 438 (34) |
| Insomnia | N/A | N/A | 318 (25) |
| Coronary Heart disease (CHD)b | 608 (16) | 177 (21) | 181 (14) |
| Diabetes | 482 (13) | 114 (13) | 221 (17) |
| Congestive heart failure (CHF)b | 198 (5) | 21 (2) | 48 (4) |
| Stroke | 220 (6) | 35 (4) | N/A |
| Osteoarthritis | 764 (21) | 246 (29) | 476 (37) |
| Osteoporosis | 640 (17) | 107 (13) | 106 (8) |
| Hypertension | 1868 (51) | 428 (50) | 774 (60) |
| High cholesterol | 1529 (41) | N/A | 687 (53) |
| Gastroesophageal reflux disease (GERD) | 1116 (30) | 254 (30) | 459 (35) |
| Stomach ulcers | 372 (11) | N/A | N/A |
| Obesity | 1227 (33) | 270 (32) | 446 (34) |
| Sleep apnea | 631 (17) | 139 (16) | 190 (15) |
| Hay fever | 900 (24) | 236 (28) | N/A |
| Peripheral Vascular Disease (PVD)b | 126 (3) | N/A | 55 (4) |
| aIncludes patients who received placebo, GLY 25 µg BID or GLY 50 µg BID.  bThese are combined as cardiovascular disease (CVD). N/A, data not available. | | | |

| **Table S3.** Participant demographics and baseline characteristics in the GOLDEN 3 and 4 trialsa, by individual comorbidities. | | | | | | | | | | | | | | |
| --- | --- | --- | --- | --- | --- | --- | --- | --- | --- | --- | --- | --- | --- | --- |
|  | **Anxiety** | **Depression** | **Insomnia** | **OSA** | **CHF** | **CHD** | **PVD** | **Obesity** | **Hypertension** | **High Cholesterol** | **Diabetes** | **GERD** | **OA** | **OP** |
| N | 342 | 438 | 318 | 190 | 48 | 181 | 55 | 446 | 774 | 687 | 221 | 459 | 476 | 106 |
| Age, years, median (range) | 60.5 (40–82) | 61.0 (40–83) | 62.0 (40–81) | 64.0 (46–81) | 65 (44–82) | 66 (42–83) | 66.0 (42–78) | 62.5 (41–85) | 65.0 (42–87) | 66 (42–85) | 64.0 (44–85) | 63.0 (41–84) | 65.0 (44–87) | 68.0 (47–82) |
| Male, n (%) | 135 (39.5) | 171 ( 39.0) | 137 (43.1) | 124 (65.3) | 26 (54.2) | 121 (66.9) | 32 (58.2) | 243 (54.5) | 459 (59.3) | 396 (57.6) | 139 (62.9) | 232 (50.5) | 252 (52.9) | 17 (16.0) |
| Current Smoker, n (%) | 221 (64.6) | 263 (60.0) | 194 (61.0) | 85 (44.7) | 23 (47.9) | 86 (47.5) | 29 (52.7) | 198 (44.4) | 376 (48.6) | 312 (45.4) | 94 (42.5) | 230 (50.1) | 244 (51.3) | 44 (41.5) |
| BMI, kg/m2 Mean (SD) | 28.7 (6.9) | 29.2 (6.8) | 28.6 (6.6) | 33.3 (7.4) | 32.2 (7.3) | 29.8 (6.4) | 28.9 (6.4) | 35.9 (5.5) | 29.7 (7.0) | 29.5 (6.4) | 32.7 (7.4) | 29.2 (6.4) | 29.6 (7.0) | 27.5 (6.1) |
| Pack-years, median (range) | 51.0 (26.1) | 51.6 (26.0) | 50.8 (26.2) | 55.7 (28.3) | 51.1 (35.8) | 59.6 (33.2) | 57.5 (26.2) | 54.2 (29.1) | 54.2 (28.4) | 55.9 (28.7) | 57.6 (28.2) | 55.4 (29.8) | 56.8 (30.3) | 54 (34.0) |
| Post-bronchodilator FEV1 % predicted, median (range) | 53.1 (13.76) | 53.4 (13.58) | 53.1 (13.75) | 53.4 (13.85) | 55.8 (14.80) | 52.3 (13.55) | 54.2 (12.28) | 52.8 (13.01) | 51.7 (13.48) | 51.7 (13.30) | 51.2 (13.02) | 53.9 (13.41) | 52.8 (13.22) | 52.8 (11.32) |
| Post-bronchodilator FEV1/FVC, % (range) | 55.7 (9.7) | 55.7 (9.6) | 55.1 (9.9) | 57.2 (9.5) | 57.3 (10.8) | 56.4 (9.9) | 56.8 (8.6) | 57.5 (9.1) | 55.3 (9.5) | 55.0 (9.6) | 56.3 (9.4) | 56.3 (9.1) | 55.2 (9.6) | 55.2 (9.1) |
| Background LABA use, n (%) | 93 (27.2) | 133 (30.4) | 102 (32.1) | 83 (43.7) | 13 (27.1) | 64 (35.4) | 16 (29.1) | 151 (33.9) | 249 (32.2) | 241 (35.1) | 82 (37.1) | 171 (37.3) | 164 (34.5) | 34 (32.1) |
| Background ICS use, n (%) | 85 (24.9) | 129 (29.5) | 92 (28.9) | 79 (41.6) | 12 (25.0) | 58 (32.0) | 14 (25.5) | 143 (32.1) | 231 (29.8) | 224 (32.6) | 76 (34.4) | 158 (34.4) | 154 (32.4) | 35 (33.0) |
| aIncludes patients who received placebo, GLY 25 µg BID or GLY 50 µg BID.  *Abbreviations:* BID,twice daily; BMI, body mass index; CHD, chronic heart disease; CHF, chronic heart failure; FEV1, forced expiratory volume in 1 second; FVC, forced vital capacity; GERD, gastroesophageal reflux disease; GLY, nebulized glycopyrrolate; ICS, inhaled corticosteroid; LABA, long-acting β2-agonist; OA, osteoarthritis; OP, osteoporosis; OSA, obstructive sleep apnea; PVD, peripheral vascular disease; SD, standard deviation. | | | | | | | | | | | | | | |

| **Table S4**. Concomitant medication by CVD categories. | | | | | | | | | | |
| --- | --- | --- | --- | --- | --- | --- | --- | --- | --- | --- |
| **n (%)** | **CVD** | | **Non-CVD** | | **CVD category- CHF** | | **CVD category- CHD** | | **CVD category- PVD** | |
| **Placebo n=93** | **GLY 25 μg BID n=77** | **Placebo n=337** | **GLY 25 μg BID n=354** | **Placebo n=19** | **GLY 25 μg BID n=10** | **Placebo n=64** | **GLY 25 μg BID n=62** | **Placebo n=30** | **GLY 25 μg BID n=13** |
| Overall | 93 (100) | 77 (100) | 307 (91.1) | 317 (89.5) | 19 (100) | 10 (100) | 64 (100) | 62 (100) | 30 (100) | 13 (100) |
| Alimentary tract and metabolism | 22 (23.7) | 12 (15.6) | 43 (12.8) | 44 (12.4) | 7 (36.8) | 1 (10.0) | 11 (17.2) | 11 (17.7) | 8 (26.7) | 3 (23.1) |
| Acetylsalicylic Acid | 62 (66.7) | 48 (62.3) | 73 (21.7) | 80 (22.6) | 11 (57.9) | 4 (40.0) | 47 (73.4) | 42 (67.7) | 19 (63.3) | 7 (53.8) |
| ACE Inhibitors, plain | 41 (44.1) | 23 (29.9) | 68 (20.2) | 79 (22.3) | 11 (57.9) | 4 (40.0) | 26 (40.6) | 15 (24.2) | 15 (50.0) | 6 (46.2) |
| Alpha and Beta blocking agents | 11 (11.8) | 10 (13.0) | 2 (0.6) | 7 (2.0) | 3 (15.8) | 3 (30.0) | 9 (14.1) | 7 (11.3) | 0 | 1 (7.7) |
| Angiotensin II Antagonists, Plain | 12 (12.9) | 10 (13.0) | 25 (7.4) | 26 (7.3) | 0 | 0 | 10 (15.6) | 9 (14.5) | 3 (10.0) | 2 (15.4) |
| Beta Blocking Agents, Selective | 45 (48.4) | 33 (42.9) | 43 (12.8) | 42 (11.9) | 9 (47.4) | 3 (30.0) | 34 (53.1) | 29 (46.8) | 14 (46.7) | 5 (38.5) |
| HMG-CoA Reductase Inhibitors | 56 (60.2) | 52 (67.5) | 110 (32.6) | 112 (31.6) | 9 (47.4) | 6 (60.0) | 42 (65.6) | 46 (74.2) | 17 (56.7) | 7 (53.8) |
| Organic Nitrates | 19 (20.4) | 18 (23.4) | 0 | 2 (0.6) | 4 (21.1) | 1 (10.0) | 18 (28.1) | 17 (27.4) | 3 (10.0) | 1 (7.7) |
| Sulfonamides, Plain | 16 (17.2) | 10 (13.0) | 17 (5.0) | 7 (2.0) | 11 (57.9) | 5 (50.0) | 7 (10.9) | 8 (12.9) | 2 (6.7) | 1 (7.7) |
| *Abbreviations:* ACE, angiotensin-converting enzyme; BID, twice daily; CHD, congestive heart disease; CHF, congestive heart failure; CVD, cardiovascular disease; GLY, glycopyrrolate; HMG-CoA, 3-hydroxy-3-methylglutaryl coenzyme A; PVD, peripheral vascular disease. | | | | | | | | | | |

| **Table S5.** Placebo-adjusted change from baseline with GLY 25 µg BID in trough FEV1 and SGRQ total and domain score at Week 12, based on CVD subgroup. | | |
| --- | --- | --- |
| **LS Mean difference (SE) from baseline** | **GLY 25 μg BID** | **p-value** |
| **Congestive heart failure** |  |  |
| n (Placebo: GLY 25 µg BID) | 19:10 |  |
| Change from baseline in trough FEV1, | 0.16 (0.08) | 0.07 |
| SGRQ total score | –11.06 (5.41) | 0.048 |
| Activity domain | –17.34 (6.35) | 0.0097 |
| Impacts domain | –7.46 (5.66) | 0.196 |
| Symptoms domain | –9.84 (6.61) | 0.15 |
| SGRQ Responder rate, OR (95% CI) | 12.57 (1.64, 96.5) | 0.0149 |
| **Coronary heart disease** |  |  |
| n (Placebo: GLY 25 µg BID) | 64:62 |  |
| Change from baseline in trough FEV1, | 0.17 (0.04) | <0.0001 |
| SGRQ total score | –4.27 (1.85) | 0.02 |
| Activity domain | –5.24 (2.55) | 0.04 |
| Impacts domain | –2.82 (2.1) | 0.18 |
| Symptoms domain | –4.79 (3.08) | 0.12 |
| SGRQ Responder rate, OR (95% CI) | 2.95 (1.27, 6.89) | 0.0123 |
| **Peripheral vascular disease** |  |  |
| n (Placebo: GLY 25 µg BID) | 30:13 |  |
| Change from baseline in trough FEV1, | 0.24 (0.08) | 0.0042 |
| SGRQ total score | –0.31 (3.77) | 0.94 |
| Activity domain | 6.92 (5.55) | 0.22 |
| Impacts domain | –2.25 (3.83) | 0.56 |
| Symptoms domain | –9.55 (6.5) | 0.15 |
| SGRQ Responder rate, OR (95% CI) | 1.19 (0.25, 5.60) | 0.829 |
| *Abbreviations:* BID, twice daily; CI, confidence interval; CVD, cardiovascular disease; GLY, glycopyrrolate; LS, least square; FEV1, forced expiratory volume in 1 second; OR, odds ratio; SE, standard error; SGRQ, St George’s Respiratory Questionnaire. | | |

| **Table S6.** Characteristics of participants with COPD in COPDGene®, SPIROMICS, GOLDEN 3 and 4 studies by comorbidity count. COPDGene® and SPIROMICS data were obtained with permission from Putcha N et al., 2014.2 | | | | | | |
| --- | --- | --- | --- | --- | --- | --- |
|  | **COPDGene**® | | **SPIROMICS** | | **GOLDEN 3 and 4a** | |
| **< 2** | **> 2** | **< 2** | **> 2** | **< 2** | **> 2** |
| N | 1,733 (47) | 1,954 (53) | 426 (50) | 427 (50) | 439 (34) | 854 (66) |
| Age, years | 62 (8.7) | 65 (8.1) | 66 (7.9) | 67 (7.6) | 62.0 (9.1) | 63.8 (8.5) |
| Current smokers, n (%) | 851 (49) | 649 (33) | 172 (40) | 107 (25) | 253 (57.6) | 431 (50.5) |
| Pack-years | 50.0 (25.7) | 55.6 (28.8) | 53.1 (25.5) | 56.0 (27.6) | 48.2 (24.5) | 54.2 (28.1) |
| Post-BD FEV1 predicted | 49.9 (19.2) | 50.5 (16.8) | 59.4 (23.7) | 62.7 (22.1) | 49.6 (14.8) | 52.8 (13.4) |
| BMI, kg/m2 | 25.7 (5.0) | 30.1 (6.5) | 24.8 (3.8) | 30.1 (5.0) | 25.97 (5.4) | 29.90 (7.0) |
| SGRQ scores | 37.9 (22.4) | 43.6 (21.1) | 34.4 (19.7) | 36.4 (18.3) | 46.8 (19.5) | 49.9 (17.5) |
| Exacerbation in past year, n (%) | 588 (34) | 938 (48) | 106 (25) | 124 (29) | 82 (18.7) | 168 (19.7) |
| Use of ICS, n (%) | 788 (46.5) | 1,100 (57.1) | 140 (40.6) | 196 (43.9) | 109 (24.8) | 266 (31.1) |
| aAll doses (placebo, GLY 25 µg BID and 50 µg BID) are used for characteristics; the placebo and GLY 25 µg BID were used for safety and efficacy, because GLY 25 µg BID is the approved dose. Values shown are mean (SD) unless otherwise noted. *Abbreviations:* BD, bronchodilator; BID, twice daily; BMI, body mass index; FEV1, forced expiratory volume in 1 second; ICS, inhaled corticosteroid; SD, standard deviation; SGRQ, St George’s Respiratory Questionnaire. | | | | | | |

**References**

1. Kerwin E, Donohue JF, Goodin T, Tosiello R, Wheeler A, Ferguson GT. Efficacy and safety of glycopyrrolate/eFlow® CS (nebulized glycopyrrolate) in moderate-to-very-severe COPD: Results from the glycopyrrolate for obstructive lung disease via electronic nebulizer (GOLDEN) 3 and 4 randomized controlled trials. *Respir Med*. Nov 2017;132:238-250. doi:10.1016/j.rmed.2017.07.011

2. Putcha N, Puhan MA, Drummond MB, et al. A Simplified Score to Quantify Comorbidity in COPD. *PLoS ONE*. 2014;9(12): e114438.
